# Supplementary material for: Nicotine rebalances NAD+ homeostasis and improves aging-related symptoms in male mice by enhancing NAMPT activity
Source: PubMed Central journal article supplement (PMC9935903; doi:10.1038/s41467-023-36543-8), 2023-02-17
Supplement: 41467_2023_36543_MOESM1_ESM.pdf [file 41467_2023_36543_MOESM1_ESM.pdf]

1 **Nicotine rebalances NAD<sup>+</sup> homeostasis and improves aging-related**  
2 **symptoms in male mice by enhancing NAMPT activity**

3 Liang Yang *et al*

4

5

6

7

8

9 **Supplementary Information**

10

11

12

13

14

15

16

17

18

19

20

21

22

23

24

25

26

27

28

29

30

31

32

33

34

35

36

37

## Supplementary Figure. 1

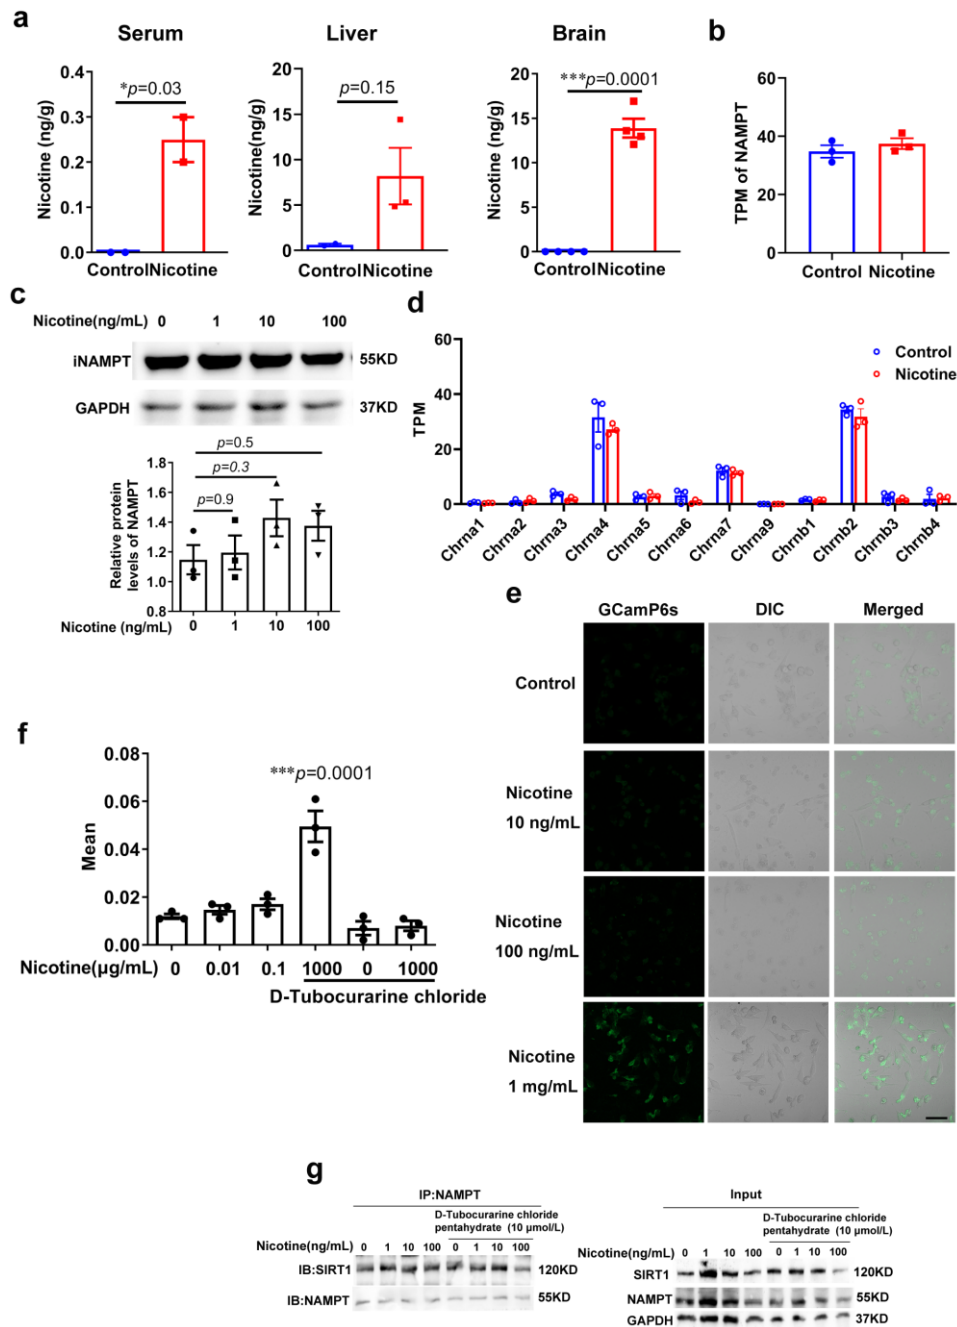

39

40 **Supplementary Figure 1. Nanogram-trace of Nicotine increased NAD<sup>+</sup> levels and did not induced**  
 41 **the nAChR activation. a.** LC-MS and quantification of nicotine (n=2-4) of mice serum, liver and brain  
 42 with or without nicotine for 6 month. **b.** The gene expression of NAMPT in aged brain with or without  
 43 nicotine for 6 months. **c.** The protein expression of the NAMPT with nicotine in a dose dependent manner  
 44 for 48 h. **d.** The gene expression of the nicotinic cholinergic receptor  $\alpha$  and  $\beta$  subunits in aged brain with  
 45 or without nicotine for 6 months. **e.** The images of nicotine effects on the states of nAChRs activity. The  
 46 scalar bar: 100  $\mu$ m. **f.** The statistical analysis of the mean fluorescence intensity of Calcium ions in  
 47 nicotine treatment (n=3 biologically independent samples/group). **(g)** Inhibition of nAChRs activity did not  
 48 affect the promoting effect of nicotine on SIRT1-NAMPT interaction. Data are means  $\pm$  SEM. *p* values

49 were determined by two-sided Student's t-test (a,b), or, One-way ANOVA with Tukey's multiple  
 50 comparisons test (c,f), or two way ANOVA analysis and Fisher's least significant difference test (d).  
 51

Supplementary Figure 2.

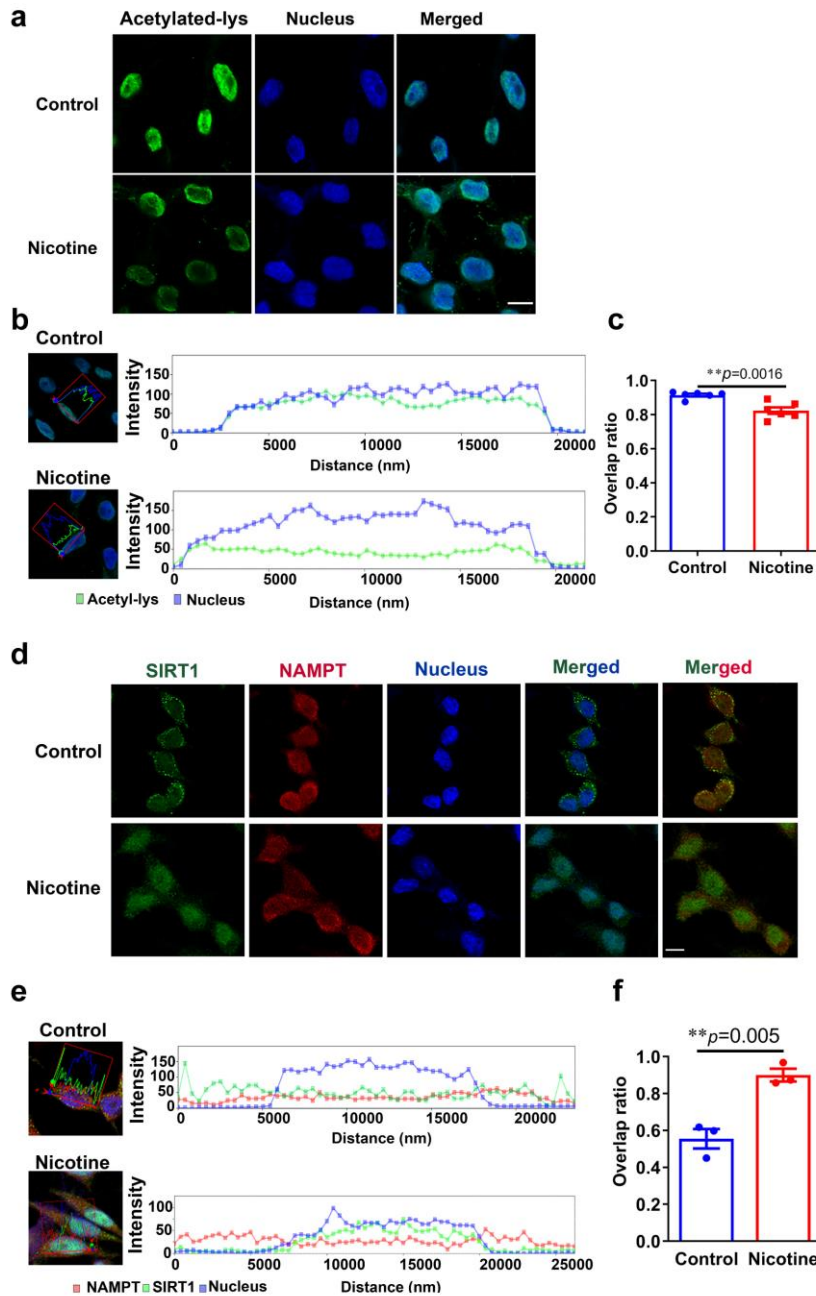

52  
 53 **Supplementary Figure 2. Nicotine increased nuclear deacetylation levels and enhanced the**  
 54 **co-localization of SIRT1 and NAMPT in HT22 cells.** **a.** Fluorescent images of HT22 cells following the  
 55 treatment of nicotine effect on nuclear acetylation. The scalar bar: 50  $\mu\text{m}$ . **b.** The fluorescent intensity and  
 56 co-localization of acetylation levels (Green) and nucleus (Blue) in single cell, administrated with or  
 57 without nicotine. The scalar bar: 20  $\mu\text{m}$ . **c.** The overlap ratio of acetylation levels and nucleus in HT22  
 58 cells (n=6 independent photos/group). **d.** The fluorescent intensity of SIRT1 (Green), NAMPT (Red) and  
 59 Nucleus (Blue) in single cell. The scalar bar: 50  $\mu\text{m}$ . **e.** The mean fluorescence intensity and

60 co-localization of SIRT1, NAMPT and Nucleus of HT22 cells administrated with or without nicotine. The  
 61 scalar bar: 20  $\mu\text{m}$ . f. The overlap ratio among SIRT1, NAMPT and nucleus in HT22 cells (n=3  
 62 independent photos/group). Data are means  $\pm$  SEM.  $p$  values were determined by two-sided Student's  
 63 t-test (c, f).  
 64

**Supplementary Figure 3.**

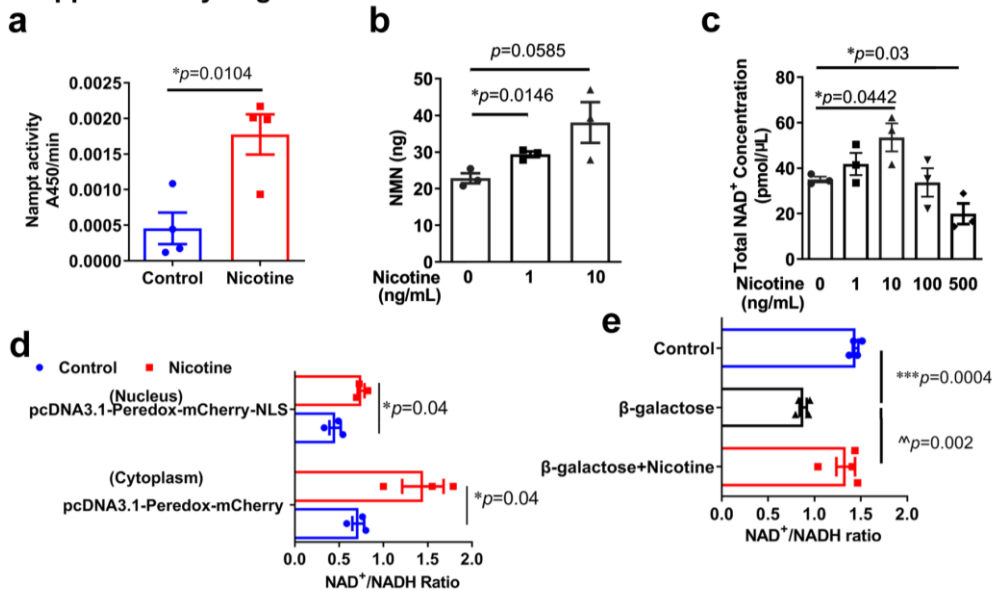

65  
 66  
 67 **Supplementary Figure 3. Nicotine increases NAD<sup>+</sup> generation and NAMPT activity *in vivo* and *in***  
 68 ***vitro*.** a. NAMPT acute activity in hippocampus of aged mice administered with or without nicotine at 13  
 69 months of age (n=4 biologically independent samples/group). b. LC-MS and quantification of  $\beta$ -NMN  
 70 content of HT22 cells with 1 ng/mL nicotine (n=3 biologically independent samples/group) and 10 ng/mL  
 71 nicotine (n=3) for 48 h. c. Total NAD<sup>+</sup> levels of HT22 cells after treated with nicotine at 1 ng/mL and 500  
 72 ng/mL for 48 h (n=3 biologically independent samples/group). d. The cytosolic NAD<sup>+</sup>/NADH ratio (n=3)  
 73 and nuclear NAD<sup>+</sup>/NADH ratio (n=3 biologically independent samples/group) were reflected by  
 74 biosensors in HT22 cells with or without nicotine. e. The NAD<sup>+</sup>/NADH ratio of  $\beta$ -galactose-induced aged  
 75 HT22 cells without nicotine and with nicotine for 7 days (n=4 biologically independent samples/group).  
 76 Data are means  $\pm$  SEM.  $p$  values were determined by two-sided Student's t-test (a) or One-way ANOVA  
 77 with Tukey's multiple comparisons test (b, c, e) two way ANOVA analysis and Fisher's least significant  
 78 difference test (d).

79  
 80  
 81  
 82

Supplementary Figure.4

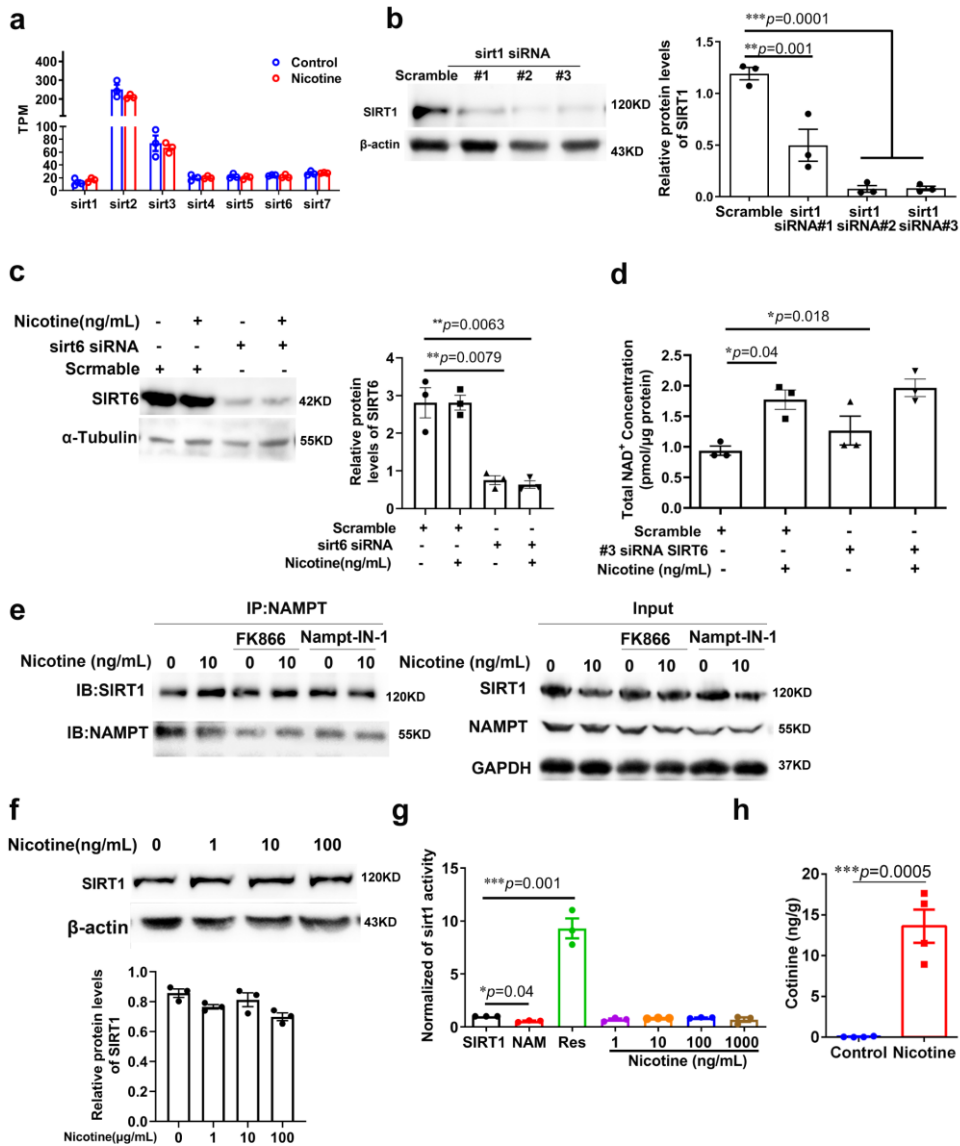

83

84 **Supplementary Figure 4. Nicotine did not change the SIRT1 expression and not directly affect**  
 85 **SIRT1 activity.** **a.** Gene expression of sirt family in aged brain with or without nicotine for 6 months. **b.**  
 86 Western blot and quantification of the protein expression of SIRT1 in nicotine-treated HT22 cells (n=3  
 87 biologically independent samples/group). **c.** Western blot and quantification of the protein expression of  
 88 SIRT6 in nicotine-treated HT22 cells (n=3 biologically independent samples/group). **d.** The total NAD<sup>+</sup>  
 89 levels of SIRT6 knockdown cells after nicotine treatment (n=3 biologically independent samples/group). **e.**  
 90 The effects of NAMPT inhibitor: FK866 and Nampt-IN-1 on SIRT1-NAMPT interaction after nicotine  
 91 treatment on HT22 cells. **f.** Western blot and quantification of silencing of SIRT1 expression in HT22 cells.  
 92 **g.** Nicotine has no effect on the purified protein SIRT1 activity (n=3 biologically independent  
 93 samples/group). **h.** LC-MS and quantification of cotinine content of mice brain with or without nicotine for  
 94 6 month (n=4). Data are means ± SEM. *p* values were determined by two way ANOVA analysis and  
 95 Fisher's least significant difference test (**a**), or two-sided Student's t-test (**h**), or One-way ANOVA with  
 96 Tukey's multiple comparisons test (**b,c,d,f,g**).

## Supplementary Figure 5.

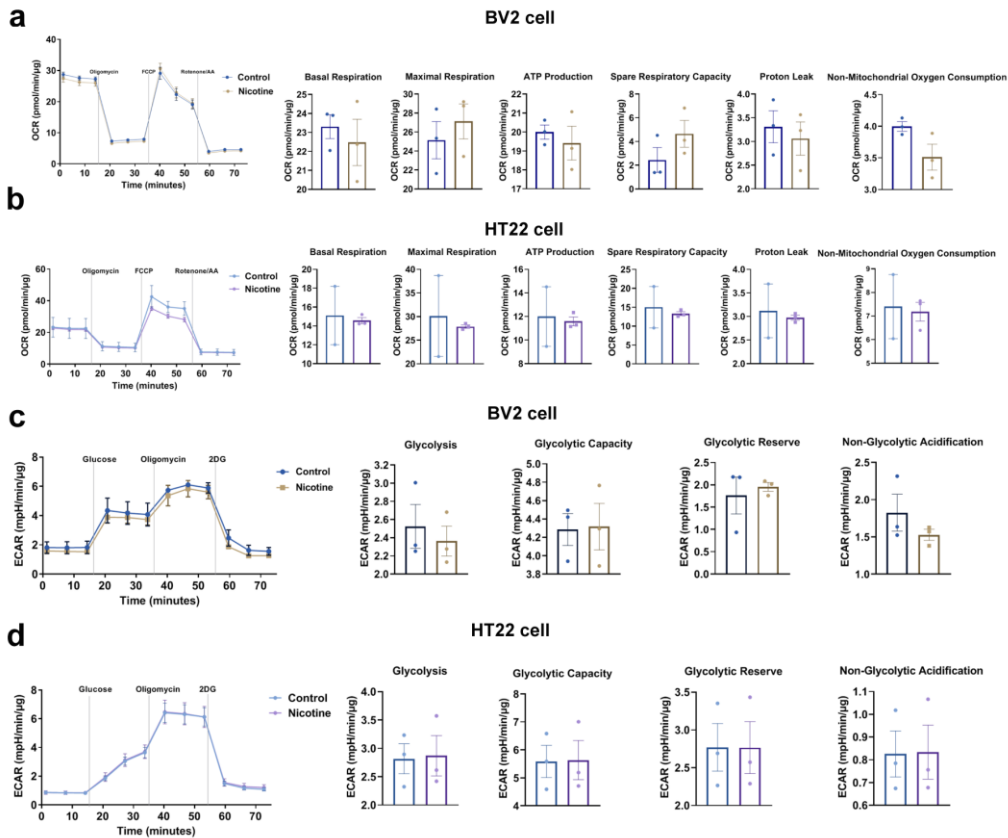

97  
98  
99  
100  
101  
102  
103  
104

**Supplementary Figure 5. Nicotine did not change the OCR and ECAR in BV2, HT22 cells.** OCR measurement of nicotine treated **a.** BV2 cell, **b.** HT22 cell and quantitative analysis of Basal respiration, ATP-linked respiration, Proton leak, Maximal respiration, Spare respiratory capacity, Non-mitochondrial oxygen consumption. ECAR of nicotine treated **c.** BV2 cell, **d.** HT22 cell and quantitative analysis of Glycolysis, Glycolytic capacity, Glycolytic reserve and non-glycolytic acidification. Data are means  $\pm$  SEM ( $n=2-3$  biologically independent samples/group).  $p$  values were determined by two-sided Student's  $t$ -test.

## Supplementary Figure 6

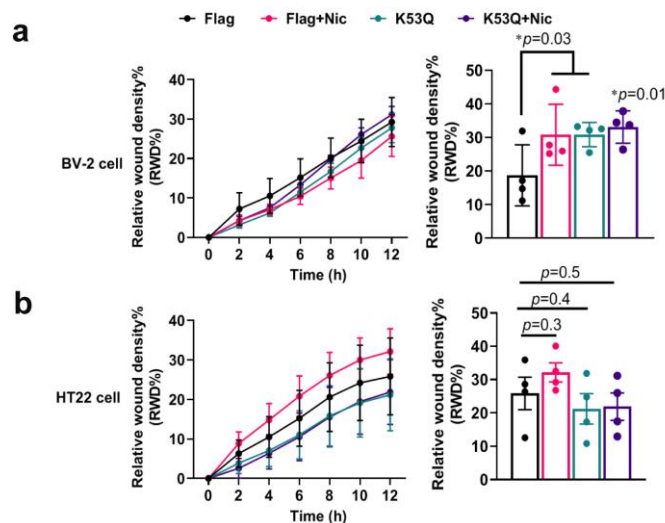

105  
106

**Supplementary Figure 6. Scratch Wound analysis of nicotine on NAMPT-K53Q cells. a.** The RWD%

107 of BV2 cells transfected NAMPT-Flag and NAMPT-K53Q with or without nicotine for 12 h (n=4  
 108 biologically independent samples/group). **b.** The RWD% of HT22 cells transfected NAMPT-Flag and  
 109 NAMPT-K53Q with or without nicotine for 12 h (n=4 biologically independent samples/group). Data are  
 110 means  $\pm$  SEM.  $p < 0.05$  values were determined by One-way ANOVA with Tukey's multiple comparisons  
 111 test (**a, b**) \* $p$  Flag+Nicotine vs Flag.  
 112

Supplementary Figure 7.

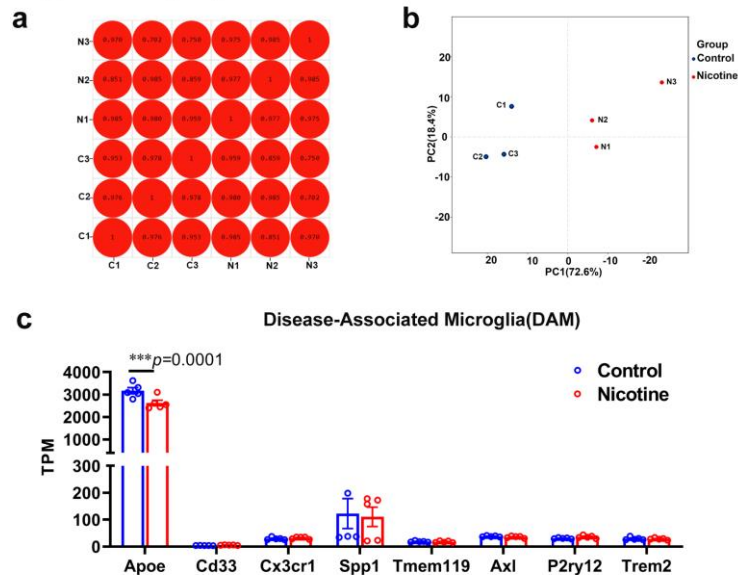

113

114 **Supplementary Figure 7. The transcriptomic analyses of nicotine administration aged mice brain.**

115 **a.** Spearman's rank correlation of aged mice brain with or without nicotine for 6 months (n=3 biologically  
 116 independent samples/group). **b.** Principal component analyses showed the percentage of explained  
 117 variance of aged mice with or without nicotine for 6 months (n=3 biologically independent samples/group).  
 118 **c.** The TPM of disease-associated microglia genes in aged mice brain with or without nicotine for 6  
 119 months (n=4 biologically independent samples/group). Data are means  $\pm$  SEM.  $p$  values were  
 120 determined by two-sided Student's t-test (**c**).  
 121

121

Supplementary Figure 8.

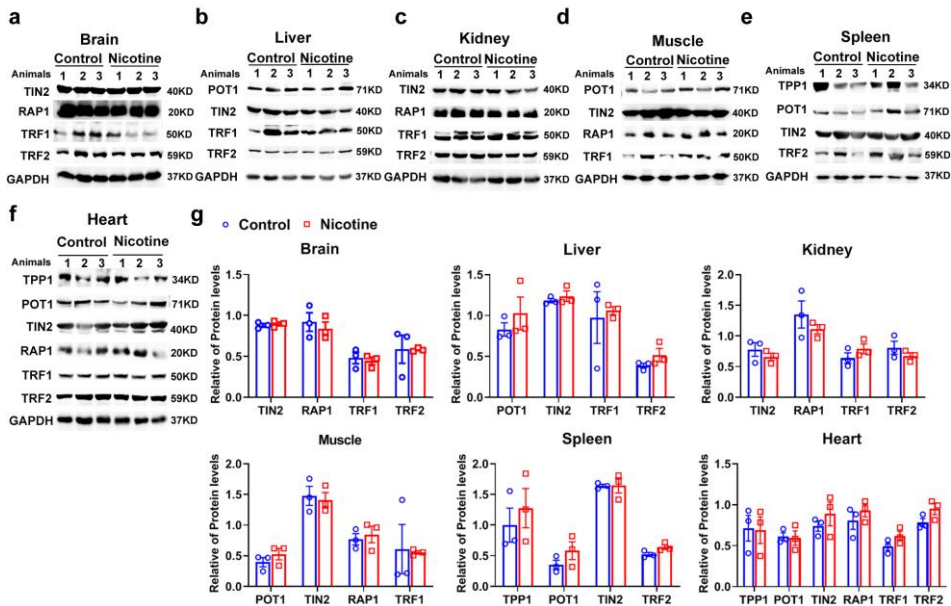

122

123

Supplementary Figure 8. Nicotine rescued the telomere shelterin complex in the aged mice.

124

Western blot and quantification of the telomere shelterin complex of a. brain, b. liver, c. kidney, d. muscle

125

e. spleen and f. Heart after 6 months nicotine administration (n=3). g. is a quantification of brain, liver,

126

kidney, muscle, spleen and heart. Quantification is normalized to GAPDH. Data are means  $\pm$  SEM. *p*

127

values were determined by two way ANOVA analysis and Fisher's least significant difference (g).

128

Supplementary Figure 9.

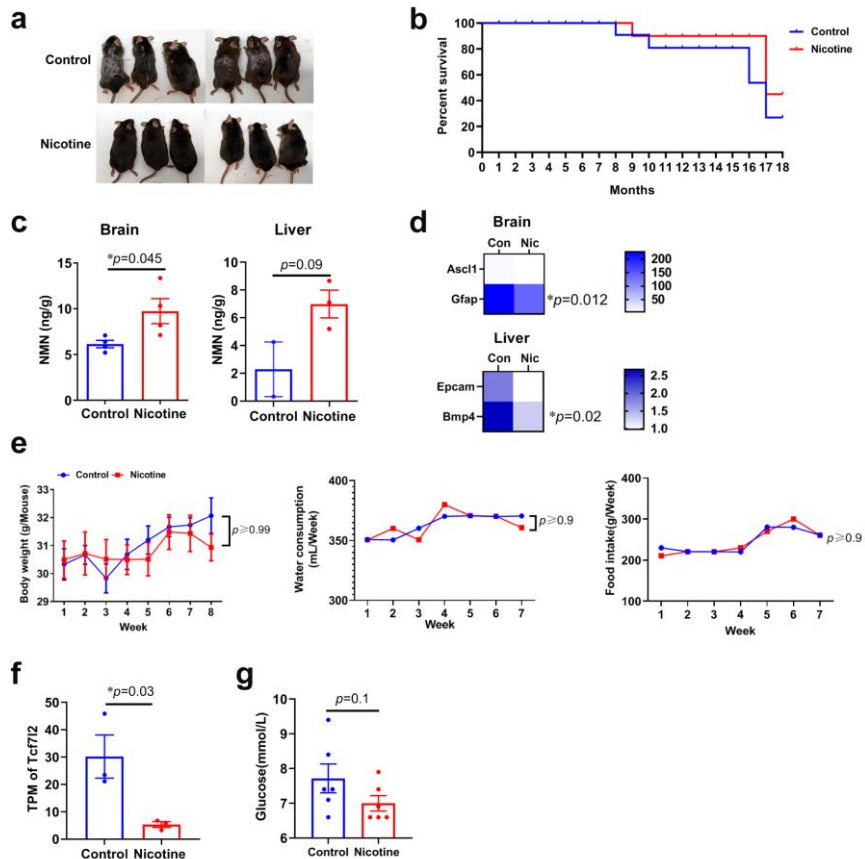

129



130 **Supplementary Figure 9. Effect of nicotine on anxiety, tumorigenesis, blood glucose, body weight,**  
131 **food and water consumption. a.** The representative images of aged male mice drink with nicotine from  
132 7 to 13-month-old mice (n=12 biologically independent samples/group). The mouse images were taken  
133 after 6 months of nicotine treatment. **b.** Kaplan-Meier curves of male C57BL/6J mice (control group n=24,  
134 Nicotine group n=24 biologically independent samples/group). **c.** LC-MS and quantification of  $\beta$ -NMN  
135 content in brain of aged mice administered with or without nicotine at 13 months of age (n=2-3  
136 biologically independent samples/group). LC-MS and quantification of  $\beta$ -NMN content in liver of aged  
137 mice administered with or without nicotine at 13 months of age (n=2-3 biologically independent  
138 samples/group) **d.** Heatmap of the TPM of tumorigenesis markers in brain: *Ascl1* and *Gfap* (n=3  
139 biologically independent samples/group) and liver: *Epcam* and *Bmp4* (n=3 biologically independent  
140 samples/group) of mice with nicotine administration for 6 months, *p* value Control (Con) vs Nicotine  
141 (Nic). **e.** The body weight, food and water consumption of control and nicotine group in 7 weeks (n=6  
142 biologically independent samples/group). **f.** TPM of brain *Tcf7l2* gene in aged mice with nicotine for 6  
143 months (n=3 biologically independent samples/group). **g.** the blood glucose of aged mice with nicotine  
144 administration for 2 months (n=6 biologically independent samples/group). Data are means  $\pm$  SEM. *p*  
145 values were determined by, two-sided Student's t-test (**c, d, e, f, g**).

146  
147  
148  
149  
150  
151  
152  
153  
154  
155  
156  
157  
158  
159  
160  
161  
162  
163  
164  
165  
166  
167  
168  
169  
170  
171  
172  
173

**Supplementary Table 1** Antibodies and compounds commercial information

| REAGENT or RESOURCE       |                 | SOURCE                    | IDENTIFIER                    |
|---------------------------|-----------------|---------------------------|-------------------------------|
| <b>Antibody</b>           |                 |                           |                               |
| Rabbit                    | Monoclonal      | Cell Signaling Technology | Cat#9475T;RRID: AB_2617130    |
| anti-SIRT1(D1D7)          |                 |                           |                               |
| Mouse                     | Monoclonal      | Santa Cruz Biotechnology  | Cat#sc393444;RRID:AB_2894708  |
| anti-PBEF(E-3)            |                 |                           |                               |
| Rabbit                    | Polyclonal      | Abcam                     | Cat#ab9485; RRID: AB_307275   |
| anti-GAPDH                |                 |                           |                               |
| Mouse                     | Monoclonal      | Sigma-Aldrich             | Cat#A1978; RRID: AB_476692    |
| anti- $\beta$ -actin      |                 |                           |                               |
| Rabbit                    | Monoclonal anti | Cell Signaling Technology | Cat#8242;RRID:AB_10859369     |
| NF- $\kappa$ b(D14E12)    |                 |                           |                               |
| Rabbit                    | Monoclonal      | Cell Signaling Technology | Cat#12486;RRID:AB_2636969     |
| anti-SIRT6(D8D12)         |                 |                           |                               |
| Mouse                     | Monoclonal      | Santa Cruz Biotechnology  | Cat# sc71819;RRID:AB_1126979  |
| anti-p53                  |                 |                           |                               |
| Mouse                     | Monoclonal      | Santa Cruz Biotechnology  | Cat# sc74465; RRID:AB_1129462 |
| anti-SIRT1                |                 |                           |                               |
| Mouse                     | Monoclonal      | s                         | Cat#sc518025;RRID:AB_2890187  |
| anti-PGC-1 $\alpha$ (D-5) |                 |                           |                               |
| Rabbit                    | Monoclonal      | Cell Signaling Technology | Cat# 47808;RRID:AB_2894709    |
| anti-BDNF                 |                 |                           |                               |
| Rabbit                    | Monoclonal      | Abcam                     | Cat#ab207175;RRID:AB_2894710  |
| anti-Doublecortin         |                 |                           |                               |
| Rabbit                    | Polyclonal      | ABclonal                  | Cat# A1491; RRID:AB_2761791   |
| Anti-POT1                 |                 |                           |                               |
| Rabbit                    | Polyclonal      | ABclonal                  | Cat#A5627;RRID:AB_2766387     |
| Anti-TPP1                 |                 |                           |                               |
| Rabbit                    | Polyclonal      | ABclonal                  | Cat#A0975;RRID: AB_2757494    |
| Anti-Rap1A                |                 |                           |                               |
| Rabbit                    | Polyclonal      | ABclonal                  | Cat#A0137;RRID: AB_2766105    |
| Anti-TERF1                |                 |                           |                               |
| Rabbit                    | Polyclonal      | ABclonal                  | Cat#A16316;RRID:AB_2772562    |
| Anti-TERF2                |                 |                           |                               |
| Rabbit                    | Polyclonal      | ABclonal                  | Cat#A9750;RRID:AB_2767352     |
| Anti-TIN2/TINF2           |                 |                           |                               |
| Mouse                     | Monoclonal      | Santa Cruz Biotechnology  | Cat#SC-32268                  |
| AC-lysine(AKL5C1)         |                 |                           |                               |
| Goat                      | anti-MOUSE      | IgG                       | Jackson immune research       |
| (H+L)                     |                 |                           | Cat# 223-005-024              |
| Goat                      | anti-Rabbit     | IgG                       | Jackson immune research       |
| (H+L)                     |                 |                           | Cat# 323-005-021              |

|                                                               |                          |                  |
|---------------------------------------------------------------|--------------------------|------------------|
| Alexa 488-conjugated Goat anti-Rabbit IgG antibody            | Thermo Scientific        | Cat#A32731       |
| Alexa 555-conjugated Goat anti-Mouse IgG antibody             | Thermo Scientific        | Cat#A32727       |
| <b>Chemicals</b>                                              |                          |                  |
| DAPI                                                          | Sigma-Aldrich            | Cat#D9542        |
| Nicotine                                                      | Sigma-Aldrich            | Cat#N3876        |
| $\beta$ -NMN                                                  | Sigma-Aldrich            | Cat#N3501        |
| Resveratrol                                                   | MedChemExpress           | Cat#HY-16561     |
| SRT1720                                                       | MedChemExpress           | Cat#HY-10532     |
| FK866                                                         | MedChemExpress           | Cat#HY-50876     |
| Nampt-IN-1                                                    | MedChemExpress           | Cat# HY-12971    |
| cotinine                                                      | MedChemExpress           | Cat#HY-B1178     |
| Selisistat                                                    | MedChemExpress           | Cat#HY15452      |
| Phosphatase inhibitor cocktail                                | Roche                    | Cat#5892791001   |
| Protein A+G Agarose beads                                     | Santa Cruz Biotechnology | Cat#sc-2003      |
| D-galactose                                                   | MedChemExpress           | Cat#HY-N0210     |
| F18-FDG                                                       | Gosun cyclotron Medicine |                  |
| D-Tubocurarine chloride pentahydrate                          | MedChemExpress           | CAT#HY-125901    |
| <b>Critical Commercial Assays</b>                             |                          |                  |
| CycLex® NAMPT Colorimetric Assay Kit Ver.2                    | MBL                      | Cat# CY-1251V2   |
| NAD/NADH assay kit                                            | Abcam                    | Cat# ab65348     |
| Pierce™ BCA Protein Assay Kit                                 | Thermo Scientific        | Cat# 23227       |
| Protein Carbonyl Colorimetric Assay Kit                       | Cayman                   | Cat# 10005020-96 |
| Universal SIRT Activity Assay Kit                             | abcam                    | Cat# ab156915    |
| SIRT1 activity assay kit                                      | Sigma-Aldrich            | Cat#             |
| Hifair® II 1st Strand cDNA Synthesis Kit (gDNA digester plus) | Yeasen                   | Cat# 11121ES60   |
| Hifair® III One Step                                          | Yeasen                   | Cat# 11143ES50   |

|                                      |                      |  |                |
|--------------------------------------|----------------------|--|----------------|
| RT-qPCR SYBR Green Kit               |                      |  |                |
| Total Antioxidant Capacity Assay Kit | Beyotime             |  | Cat#S0119      |
| Cu/Zn-SOD and Mn-SOD Assay Kit       | Beyotime             |  | Cat#S0103      |
| Cell Mito Stress Test Kit            | Agilent Technologies |  | Cat#103015-100 |
| Glycolysis stress Test Kit           | Agilent Technologies |  | Cat#103020-100 |

### Experimental Models:

#### Cell Lines

|                |                        |  |                 |
|----------------|------------------------|--|-----------------|
| HT22 cell line | BeNaCultureCollect ion |  | Cat# BNCC337709 |
| BV2 cell line  | BeNaCultureCollect ion |  | Cat# BNCC337749 |

#### Experimental Models:Organisms/Strains

|                 |                                            |  |  |
|-----------------|--------------------------------------------|--|--|
| Mouse: C57bl/6J | Guangdong Medical Laboratory Animal Center |  |  |
|-----------------|--------------------------------------------|--|--|

#### Software and Algorithms

|                          |                              |  |                                                                                                                       |
|--------------------------|------------------------------|--|-----------------------------------------------------------------------------------------------------------------------|
| GraphPad Prism           | GraphPad Software (version8) |  | <a href="http://www.graphpad.com/scientificsoftware/prism/">http://www.graphpad.com/scientificsoftware/prism/</a>     |
| ImageJ                   | NIH                          |  | <a href="http://imagej.nih.gov/ij/">http://imagej.nih.gov/ij/</a>                                                     |
| Zen 2011                 | Carl Zeiss                   |  | <a href="https://www.zeiss.com/microscopy/int/downloads.html">https://www.zeiss.com/microscopy/int/downloads.html</a> |
| Noldus                   | Noldus                       |  | <a href="https://www.noldus.com.cn/animal-behavior-research/">https://www.noldus.com.cn/animal-behavior-research/</a> |
| Quantity One             | Bio-rad                      |  | <a href="https://www.bio-rad.com">https://www.bio-rad.com</a>                                                         |
| Incucyte <sup>®</sup> S3 | Sartorius                    |  | <a href="http://www.sartorius.com/Incucyte">www.sartorius.com/Incucyte</a>                                            |
| Wave                     | Agilent Technologies         |  | <a href="http://www.agilent.com">www.agilent.com</a>                                                                  |

175

176 **Supplementary Table 2** siRNA and Oligonucleotides

|                                            |  |            |
|--------------------------------------------|--|------------|
| siRNA                                      |  |            |
| Scrambled:FW:5'- UUCUUCGAACGUGUCACGUTT-3'  |  | GenePharma |
| Scrambled:RV:5'- ACGUGACACGUUCGGAGAATT -3' |  | GenePharma |

|                                                                 |                                               |
|-----------------------------------------------------------------|-----------------------------------------------|
| #1 sirt1:FW: 5'-GCGGAUAGGUCCAUAUACUTT-3'                        | GenePharma                                    |
| #1 sirt1:RV:5'- AGUAUAUGGACCUAUCCGCTT-3'                        | GenePharma                                    |
| #2 sirt1:FW: 5'- CCGUCUCUGUGUCACAAAUTT-3'                       | GenePharma                                    |
| #2 sirt1:RV: 5'- AUUUGUGACACAGAGACGGTT-3'                       | GenePharma                                    |
| #3 sirt1:FW:5'- GGGAUCAAGAGGUUGUUAATT-3'                        | GenePharma                                    |
| #3 sirt1:RV:5'- UUAACAACCUUCUUGAUCCCTT-3'                       | GenePharma                                    |
| #1 sirt6:FW: 5'- GGUCAUUGUCAACCUGCAATT-3'                       | GenePharma                                    |
| #1 sirt6:RV:5'- UUGCAGGUUGACAAUGACCTT-3'                        | GenePharma                                    |
| #2 sirt6:FW: 5'- GCUGCACGGAAACAUGUUUTT-3'                       | GenePharma                                    |
| #2 sirt6:RV: 5'- AAACAUGUUUCCGUGCAGCTT-3'                       | GenePharma                                    |
| #3 sirt6:FW:5'- GCUACGUGGAUGAGGUGAUTT-3'                        | GenePharma                                    |
| #3 sirt6:RV:5'- AUCACCUCAUCCACGUAGCTT-3'                        | GenePharma                                    |
| Oligonucleotides                                                |                                               |
| Telomeric:FW:5'-<br>CGGTTTGGTTGGGTTGGGTTGGGTTGGGTTGGGTTGGGTT-3' | Callicott and Womack,<br>2006; Cawthon, 2002) |
| Telomeric:RV:5'-<br>GGCTTGCCTTACCCTTACCCTTACCCTTACCCTTACCCT-3'  | Callicott and Womack,<br>2006; Cawthon, 2002) |
| 36B4:FW:5'- ACTGGTCTAGGACCCGAGAAG-3'                            | Callicott and Womack,<br>2006; Cawthon, 2002) |
| 36B4:RV:5'- TCAATGGTGCCTCTGGAGATT-3'                            | Callicott and Womack,<br>2006; Cawthon, 2002) |

177

178
